# Supplementary material for: Cinnamic acid lowers blood pressure and reverses vascular endothelial dysfunction in rats
Source: PubMed Central journal article supplement — J Food Drug Anal. 2024 Dec 15;32(4):577–88. doi: 10.38212/2224-6614.3530 (PMC11698596; doi:10.38212/2224-6614.3530), 2024-12-15
Supplement: jfda-32-04-577-s001.pdf [file jfda-32-04-577-s001.pdf]

---

## *Research Highlights*

---

- Cinnamic acid (CA) induced antihypertensive effect, more potent in high salt-induced (8% NaCl) hypertensive rats.
- The antihypertensive effect is the outcome of vascular and cardiac effects of CA.
- The vasorelaxant effect is the result of synergistic effect of CA on endothelium and VSM<sub>s</sub>, mediated through muscarinic receptors-linked NO and PGI<sub>2</sub> and activation of K<sup>+</sup> channels and blockade of Ca<sup>++</sup> channels.
- The decrease in cardiac output is due to blockade of cardiac β-adrenoceptor.
- These mechanisms explain the medicinal importance of CA as antihypertensive agent.
- The current investigation includes CA among the rare drugs with dual action on calcium channels and beta receptors.
